# Supplementary material for: Different impacts of adipose tissue dynamics on prognosis in patients with resectable locally advanced rectal cancer treated with and without neoadjuvant treatment
Source: PubMed Central journal article supplement (PMC11324464; doi:10.3389/fonc.2024.1421651), 2024-08-01

**Supplementary Figure.1** Flowchart of patient selection. nCRT= neoadjuvant chemoradiotherapy; LARC= locally advanced rectal cancer

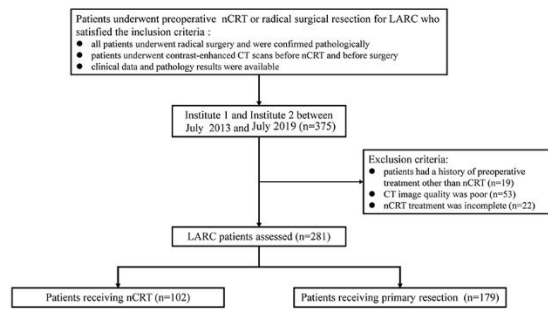

Supplement: Image_1.pdf [file Image_1.pdf]
